# Supplementary material for: Mechanisms Underlying Antigen-Specific Tolerance of Stable and Convertible Th17 Cells During Suppression of Autoimmune Diabetes
Source: PubMed Central journal article supplement — Diabetes. 2012 Jul 17;61(8):2054–65. doi: 10.2337/db11-1723 (PMC3402331; doi:10.2337/db11-1723), 2012-07-17
Supplement: supp_db11-1723_DB111723SupplementaryData.pdf [file supp_db11-1723_DB111723SupplementaryData.pdf]

## SUPPLEMENTARY DATA

**Antibodies.** Anti-CD4 (RM4-5), anti-V $\beta$ 4 (KT4), anti-IFN $\gamma$  (XMG1.2) and anti-IL-17 (TC11-18H10) were purchased from BD Pharmingen. Anti-T-bet (ebio4B10) and anti-ROR $\gamma$ t (AFKJS-9) were purchased from eBioscience. Anti-CXCR3 (CXCR3-173), anti-CCR6 (29-2L17), and anti-FASL (MFL3) were purchased from Biologend. 7-amino-actinomycin D (7-AAD) was purchased from EMD Biosciences.

**Isolation of pancreatic cells.** Pancreatic islets and infiltrating cells were purified as described (1). Briefly, the pancreata were digested with collagenase Type IV (Invitrogen) and islets were separated on a ficoll gradient (GE Healthcare). The morphology of purified islets was confirmed by light microscopy, and the infiltrating cells were isolated by mechanical disruption.

**Quantitative PCR analysis.** The total RNA of pancreatic islets was extracted using the TRI RNA isolation reagent (Sigma). Quantitative PCR with specific primers was performed using the Power SYBR Green kit and the StepOnePlus instrument (all from Applied Biosystems). The primers are as follows:

*ccl9*

forward, 5'-CGAGGCACGATCCACTACAAAT-3'

reverse, 5'-TCTAGGCAGGTTTGATCTCCGT-3'

*ccl10*

forward, 5'-CATCAGCACCATGAACCCAAGT-3'

reverse, 5'-TTCCCTATGGCCCTCATTCTCA-3'

*ccl11*

forward, 5'-AATTTACCCGAGTAACGGCTGC-3'

reverse, 5'-ATTATGAGGCGAGCTTGCTTGG-3'

*ccl20*

forward, 5'-CTGCTCTTCCTTGCTTTGGCAT-3'

reverse, 5'-TCATCGGCCATCTGTCTTGTGA-3'

*Actb*

forward, 5'-TACAATGAGCTGCGTGTGGC-3'

reverse, 5'-AGCCTGGATGGCTACGTACA-3'.

Gene expression was calculated based on  $\Delta\Delta$ CT upon normalization to *Actb* gene expression.

SUPPLEMENTARY DATA

**Supplementary Figure 1.** Sorted Th1 and Th17 cells display high degree of purity. Splenic cells from NOD.BDC2.5.FoxP3GFP.DTR mice were cultured under Th1 and Th17 polarizing conditions and the CD4+ T cells were isolated by negative selection. The purified T cells were then stimulated with PMA/ionomycin for 2h, and IFN $\gamma$ - (Th1) and IL-17- (Th17) producing T cells were labeled using the Mouse IFN $\gamma$  and IL-17 detection kit. The culture was depleted of GFP+ (Tregs) cells and the Th1 and Th17 cells were sorted using the MoFlo XDP sorter. The panels show polarized Th1 and Th17 cells before and after sorting.

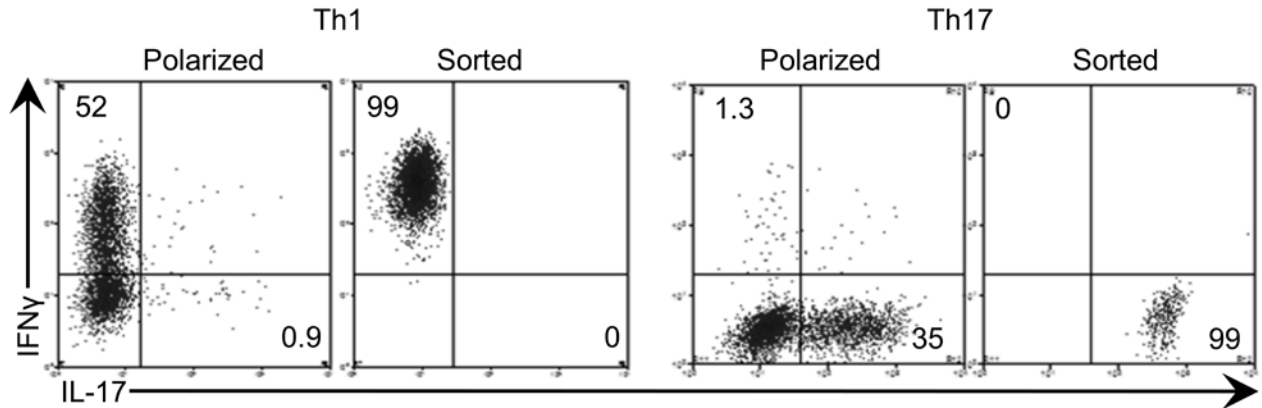

**Supplementary Figure 2.** Converted Th1 cells display equivalent proliferative and survival attributes in the spleen and pancreas of Ig-p79-versus Ig-HEL- treated NOD.scid mice. NOD.scid mice were transferred with CFSE-labeled Th17 cells, and the hosts were treated with Ig-p79 or the control Ig-HEL. The converted Th1 cells were then sorted from the spleens and pancreata and analyzed for CFSE dilution (A) and incorporation of 7-AAD (B) as a measure of proliferation and survival, respectively. The numbers represent MFI (A) and mean  $\pm$  SEM percent of 7-AAD+ cells (B). The results are representative of 3 independent experiments.

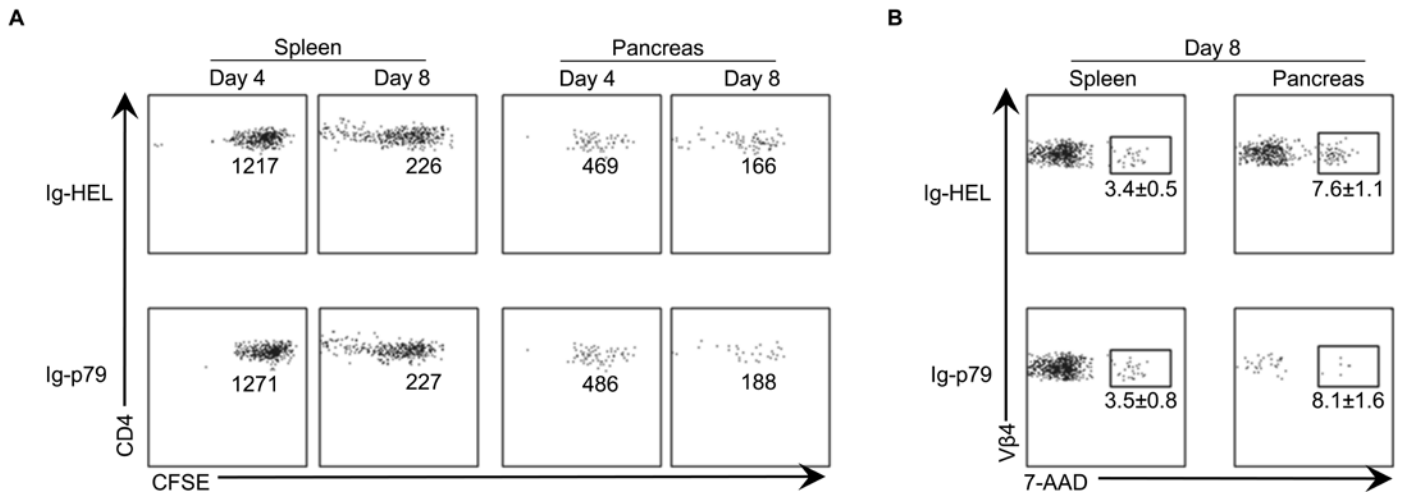

REFERENCES

1. Faveeuw C, Gagnerault MC, Lepault F: Isolation of leukocytes infiltrating the islets of Langerhans of diabetes-prone mice for flow cytometric analysis. *J Immunol Methods* 1995; 187:163-169
